# Supplementary material for: An observational constraint on stomatal function in forests: evaluatingcoupled carbon and water vapor exchange with carbon isotopes in theCommunity Land Model (CLM4.5)
Source: Copernicus journal article supplement (doi:10.5194/bg-13-5183-2016), 2016-09-19
Supplement: Supplementary file 2 [file bg-13-5183-2016-supplement.zip]

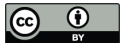

## *Supplement of*

# **An observational constraint on stomatal function in forests: evaluating coupled carbon and water vapor exchange with carbon isotopes in the Community Land Model (CLM4.5)**

**Brett Raczka et al.**

*Correspondence to:* Brett Raczka ([brett.raczka@utah.edu](mailto:brett.raczka@utah.edu))

- [bg-13-5183-2016-supplement-title-page.pdf](#)
- [atmosphere\\_data.xlsx](#)
- [supplement.pdf](#)

The copyright of individual parts of the supplement might differ from the CC-BY 3.0 licence.
